# Supplementary material
Source: PubMed Central journal article supplement (PMC7007369)
Supplement: NIHMS1050859-supplement-Supp_FigS1.pdf [file NIHMS1050859-supplement-Supp_FigS1.pdf]

# Figure S1.

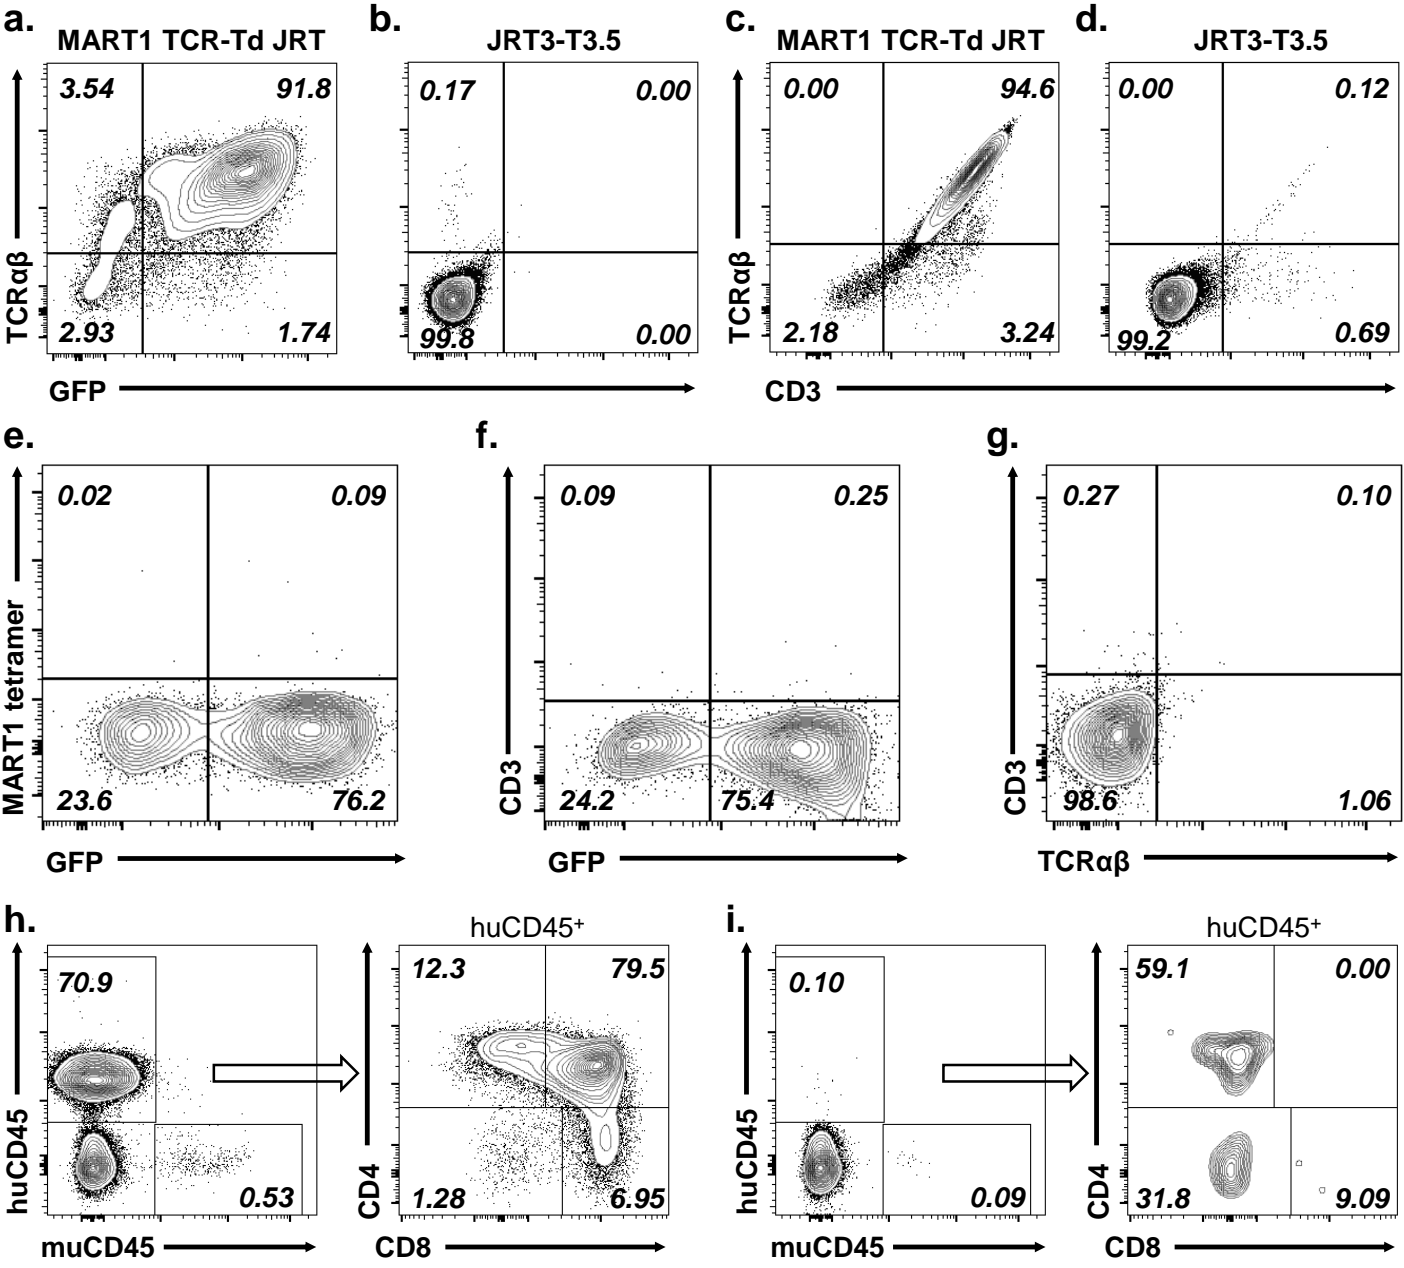

**Figure S1: MART1 TCR expresses on the surface of CD3<sup>+</sup> cells.** TCRαβ staining of **a.** MART1 TCR transduced and **b.** untransduced JRT3-T3.5 cells. TCRαβ and CD3 staining of **e.** MART1 TCR transduced and **f.** untransduced JRT3-T3.5 cells. MART1 TCR lentivirus-transduced HEK-293FT cells stained with **e.** MART1 tetramer, **f.** TCRαβ, and **g.** TCRαβ and CD3 staining. **h.** At 13 weeks post-transplantation the native mouse thymus supports robust human thymopoiesis in mice transplanted with mock transduced human CD34<sup>+</sup> cells, but after thymectomy **i.** no residual thymopoiesis is detected in the anterior mediastinum.
