# Supplementary material
Source: PubMed Central journal article supplement (PMC7007369)
Supplement: NIHMS1050859-supplement-Supp_FigS2.pdf [file NIHMS1050859-supplement-Supp_FigS2.pdf]

# Figure S2.

**a.**

| Tissue       |                                       | Species | CD34 <sup>+</sup> Purity | Mice transplanted | HLA-A    |          | HLA-B    |          | HLA-C    |          | DRB      |          | DQB      |          |
|--------------|---------------------------------------|---------|--------------------------|-------------------|----------|----------|----------|----------|----------|----------|----------|----------|----------|----------|
| Fetal Liver  | HLA-A2 <sup>+</sup> CD34 <sup>+</sup> | Human   | 87%                      | 15                | 02:01:01 | 31:01:02 | 07:02:01 | 07:02:01 | 15       | 07:02:01 | 15:01:01 | 03:01:01 | 02:01:01 | 02:04    |
| Fetal Liver  | HLA-A2 <sup>+</sup> CD34 <sup>+</sup> | Human   | 94%                      | 3                 | 02:01:01 | 29:02:01 | 07:02:01 | 44:03:00 | 07:02:01 | 08:02:01 | 07:01:01 | 04:08:01 | 02:02:01 | 3:01:01  |
| Fetal Thymus | HLA-A2 <sup>+</sup> Thy               | Human   | -                        | 6                 | 01:01:01 | 02:01:01 | 45:01    | 40:01:01 | 03:04:01 | 06:02:01 | 13:02:01 | 09:01:02 | 02:01:01 | 06:04:01 |
| Fetal Thymus | HLA-A2 <sup>+</sup> Thy               | Human   | -                        | 1                 | 02:01:01 | 29:02:01 | 07:02:01 | 44:03:00 | 07:02:01 | 08:02:01 | 07:01:01 | 04:08:01 | 02:02:01 | 3:01:01  |
| Fetal Thymus | HLA-A2 <sup>-</sup> Thy               | Human   | -                        | 4                 | 01:01:01 | 30:02:01 | 07:01:01 | 08:02:01 | 14:02:01 | 58:01    | 15:03:01 | 04:04:01 | 06:02:01 | 03:02:01 |

  

|              |           |       |   |   | Haplotype   |   |              |   |
|--------------|-----------|-------|---|---|-------------|---|--------------|---|
|              |           |       |   |   | MHC Class I |   | MHC Class II |   |
| Fetal Thymus | Swine Thy | Swine | - | 5 | C           | D | A            | C |
| Fetal Thymus | Swine Thy | Swine | - | 2 | D           | D | D            | D |

**b.**

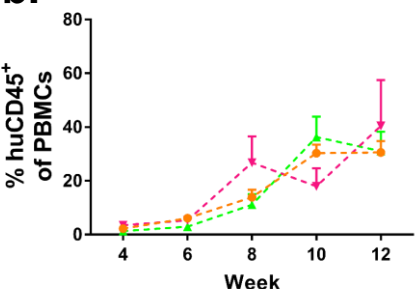

**c.**

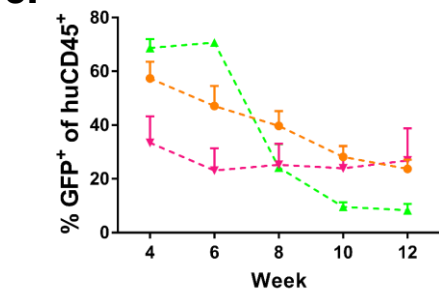

—●— MART1 TCR HLA-A2<sup>+</sup> Thymus  
—▼— MART1 TCR Swine Thymus  
—▲— MART1 TCR HLA-A2<sup>-</sup> Thymus

**d.**

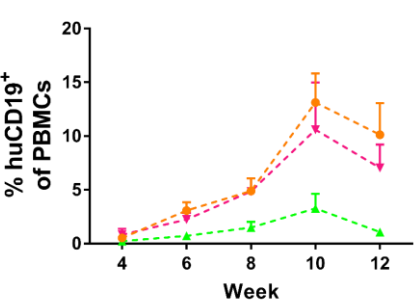

**e.**

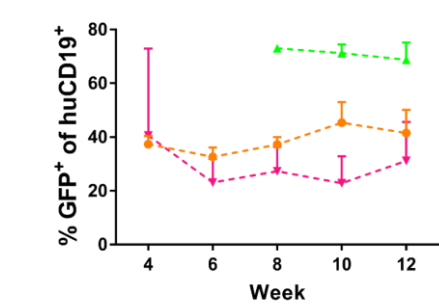

**f.**

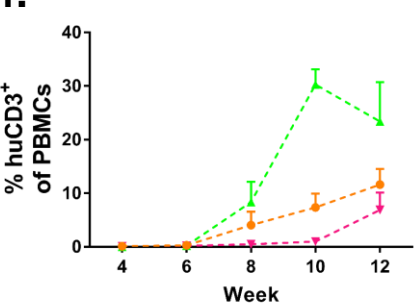

**g.**

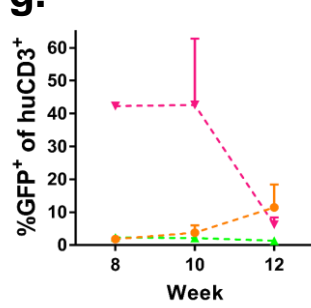

**h.**

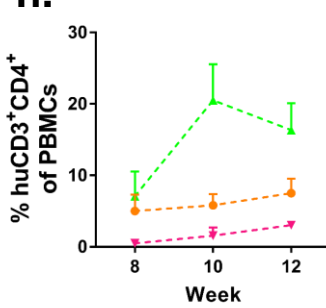

**i.**

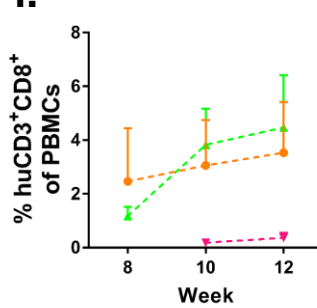

**Figure S2: a.** Table of fetal tissues used in transplantation experiments, including detailed molecular HLA-typing. Peripheral blood chimerism of transplanted mice. Data is a compilation of chimerism data from A2<sup>+</sup> n = 6, Sw = 6 and A2<sup>-</sup> n = 4 mice. **b.** human CD45<sup>+</sup>; **c.** % GFP<sup>+</sup> of total human PBMCs; **d.** CD19<sup>+</sup> B cell chimerism in PBMCs; **e.** % GFP<sup>+</sup> of human B cells; **f.** CD3<sup>+</sup> T cell chimerism in PBMCs; **g.** % GFP<sup>+</sup> of human T cells; **h.** CD3<sup>+</sup>CD4<sup>+</sup> and **i.** CD3<sup>+</sup>CD8<sup>+</sup> T cells. Mean + SEM is shown. Some data points are excluded because proportions of B cells, T cells, %GFP<sup>+</sup> cells in a given population, and T cell subset were only included when greater than 50 events were detected in the preceding gate. T cells develop more slowly in transplanted mice than do B cells, so %GFP<sup>+</sup> and subset were only assessed from weeks 8-12 post-transplant.
