# Supplementary material
Source: PubMed Central journal article supplement (PMC7007369)
Supplement: NIHMS1050859-supplement-Supp_FigS3.pdf [file NIHMS1050859-supplement-Supp_FigS3.pdf]

# Figure S3.

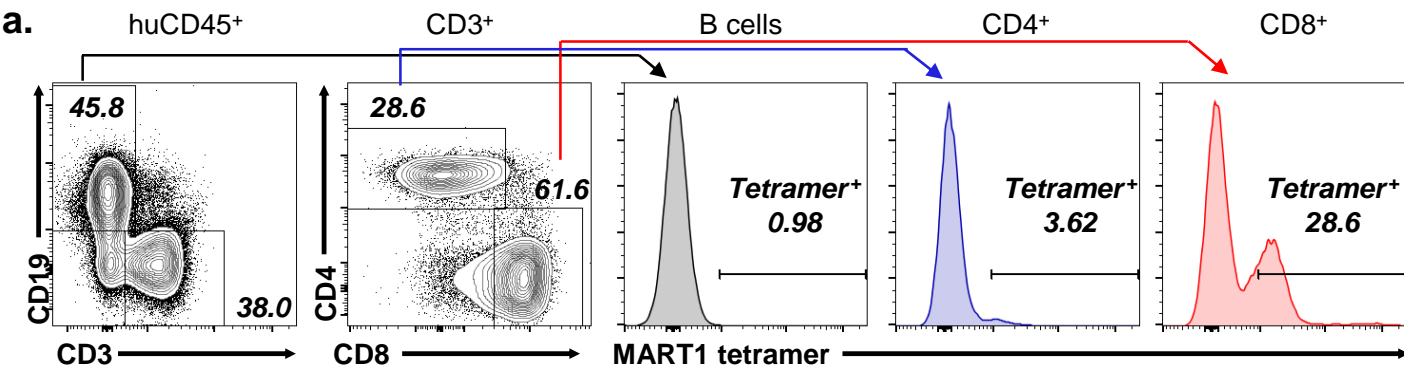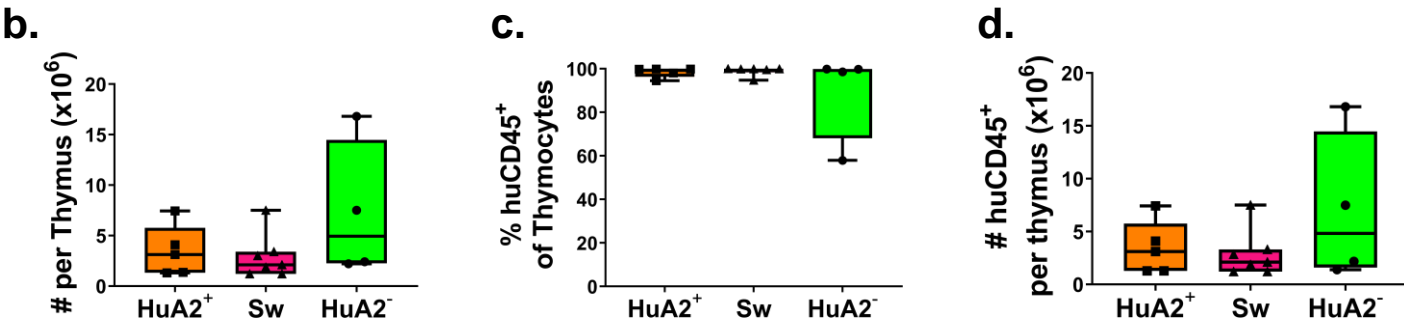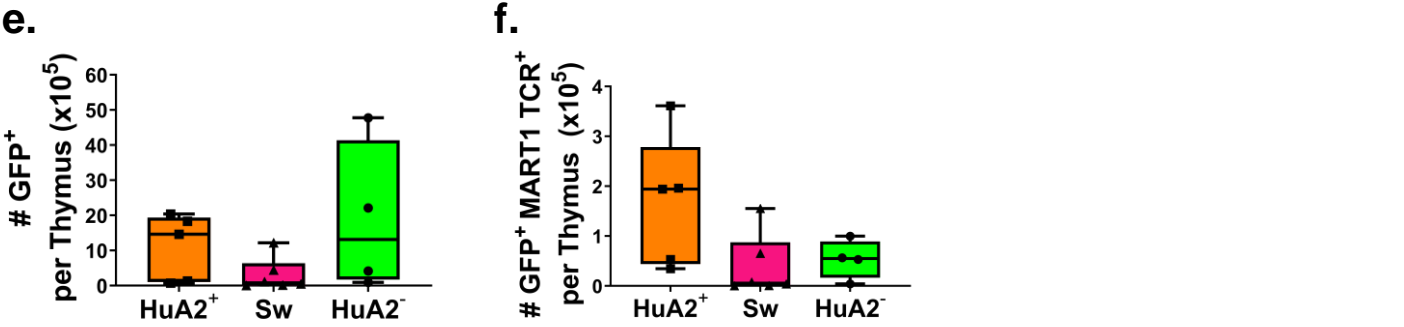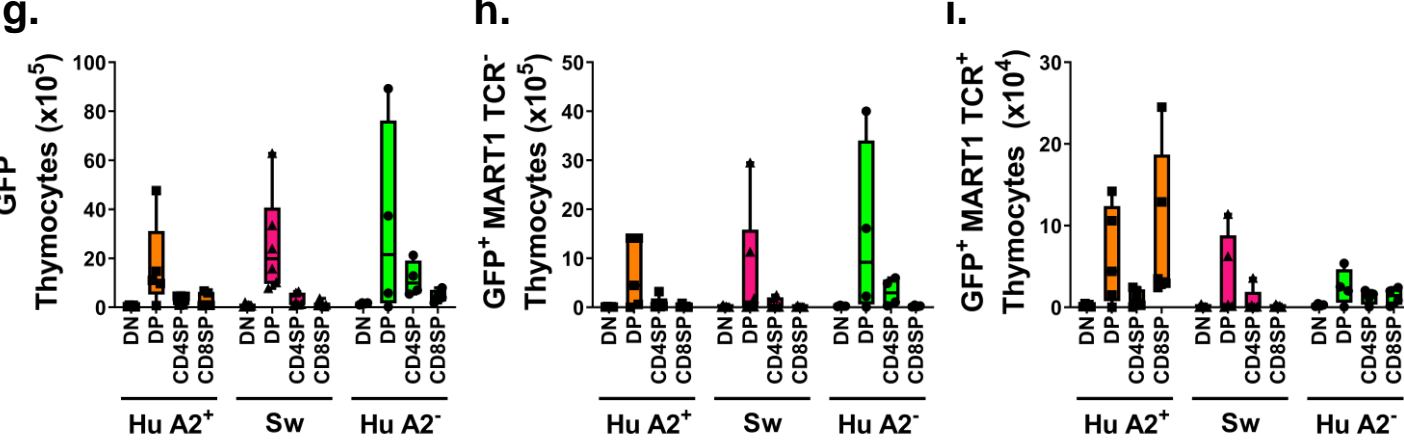

**Figure S3:** a. Mart1 tetramer staining of splenocytes from a humanized mouse transplanted with Mart1 TCR-transduced HLA-A2<sup>+</sup> fetal liver CD34<sup>+</sup> cells and an HLA-A2<sup>+</sup> fetal thymus fragment. b. Absolute counts of thymus grafts at takedown, 10-14 weeks post-transplantation. c. Percent and d. absolute counts of human CD45<sup>+</sup> cells in thymus grafts. Absolute counts of e. GFP<sup>+</sup> and f. GFP<sup>+</sup> MART1 TCR<sup>+</sup> cells in grafted thymi at takedown. Absolute counts of thymocyte subpopulations of g. GFP<sup>-</sup>, h. GFP<sup>+</sup> MART1 TCR<sup>-</sup>, and i. GFP<sup>+</sup> MART1 TCR<sup>+</sup> thymocytes. A2<sup>+</sup> n = 5, Sw = 6 and A2<sup>-</sup> n = 4 mice included in analysis.
