# Supplementary material
Source: PubMed Central journal article supplement (PMC7007369)
Supplement: NIHMS1050859-supplement-Supp_figS4.pdf [file NIHMS1050859-supplement-Supp_figS4.pdf]

# Figure S4.

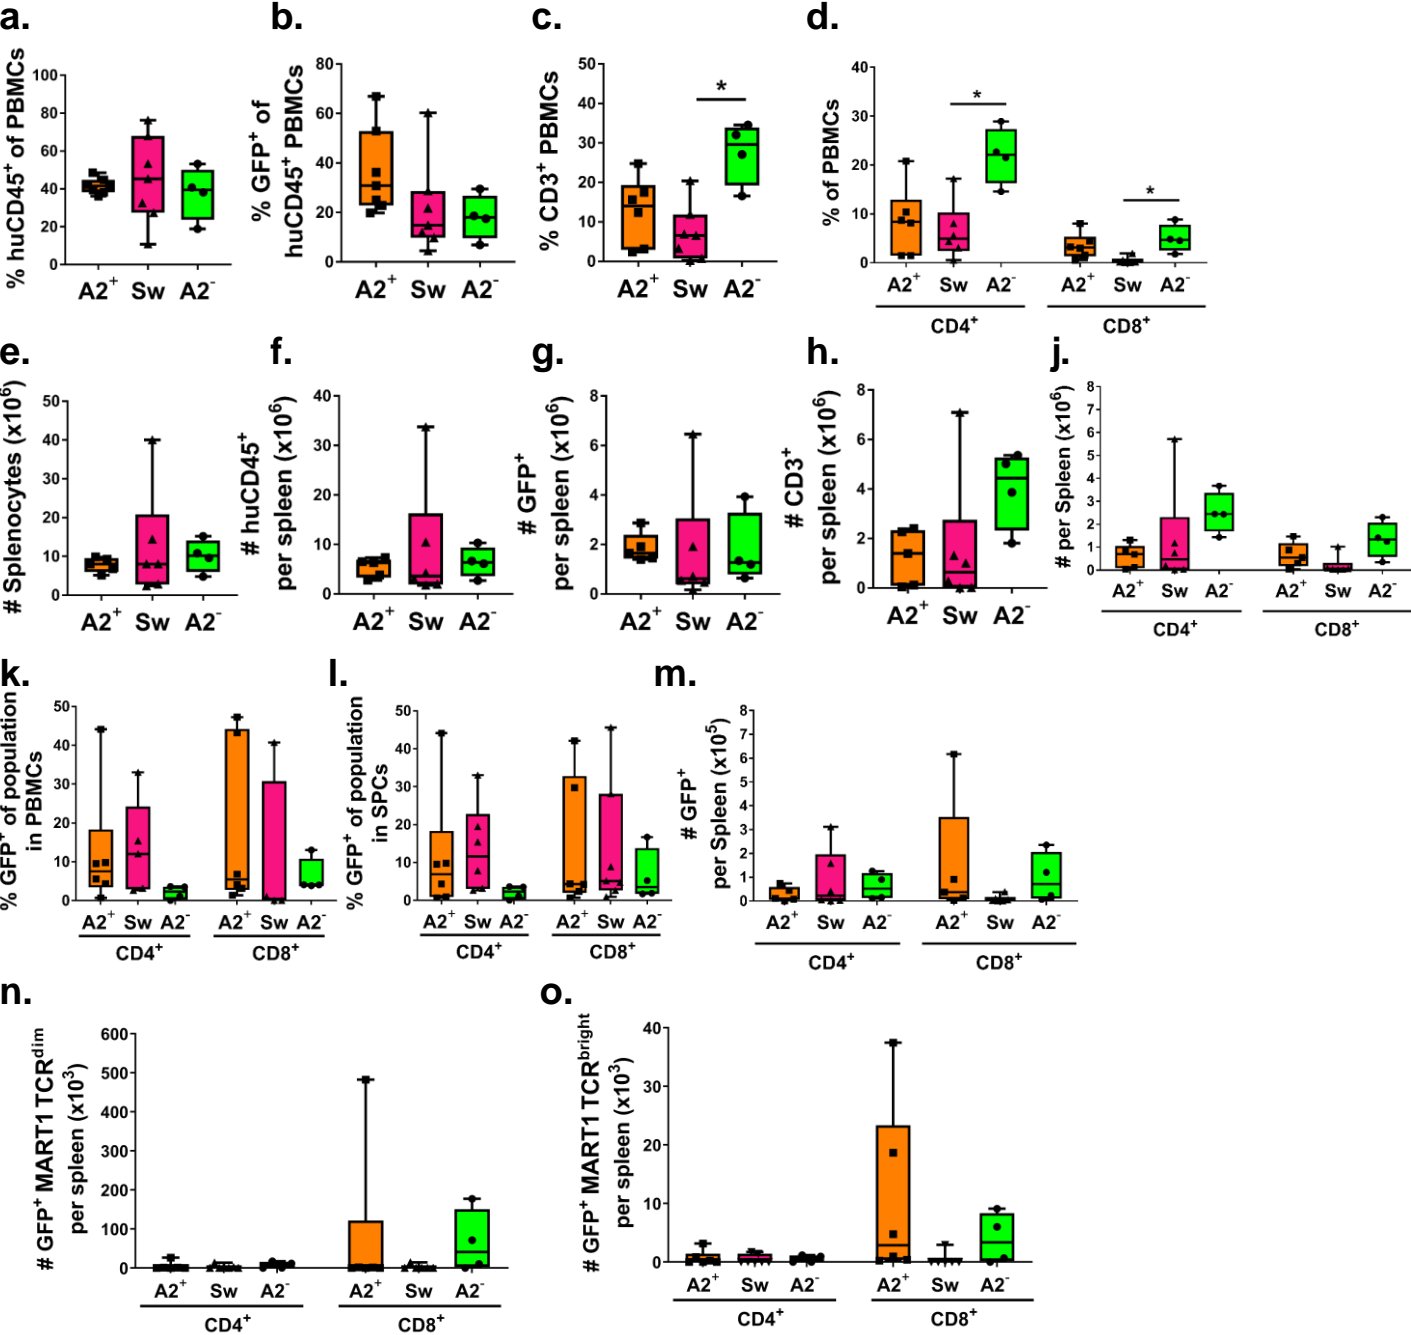

**Figure S4:** Proportions of **a.** huCD45<sup>+</sup> cells; **b.** percent of GFP<sup>+</sup> of huCD45<sup>+</sup> cells; and **c.** proportions of T cells and **d.** CD4<sup>+</sup> and CD8<sup>+</sup> T cells of PBMCs. Absolute counts in transplanted mice, of **e.** total splenocytes, **f.** total huCD45<sup>+</sup> cells per spleen, **g.** total GFP<sup>+</sup> cells per spleen, **h.** total CD3<sup>+</sup> T cells, **i.** total CD4<sup>+</sup>CD3<sup>+</sup> and CD8<sup>+</sup>CD3<sup>+</sup> cells. Percent GFP<sup>+</sup> of CD4<sup>+</sup> and CD8<sup>+</sup> T cells in **k.** PBMCs or **l.** splenocytes, and absolute counts of **m.** GFP<sup>+</sup>CD4<sup>+</sup> and GFP<sup>+</sup>CD8<sup>+</sup> T cells among splenocytes. **n.** total GFP<sup>+</sup>Mart1<sup>dim</sup> and **o.** total GFP<sup>+</sup>Mart1<sup>bright</sup> T cells per spleen. Data are from A2<sup>+</sup> n = 6, Sw n = 5 and A2<sup>-</sup> n = 4 transplanted mice, respectively, at takedown, 10-14 weeks post-transplantation. \* = p < 0.05 by the Kruskal-Wallis test using Dunn's correction for multiple comparisons.
