# Supplementary material
Source: PubMed Central journal article supplement (PMC7007369)
Supplement: NIHMS1050859-supplement-Supp_figS5.pdf [file NIHMS1050859-supplement-Supp_figS5.pdf]

**Figure S5.**

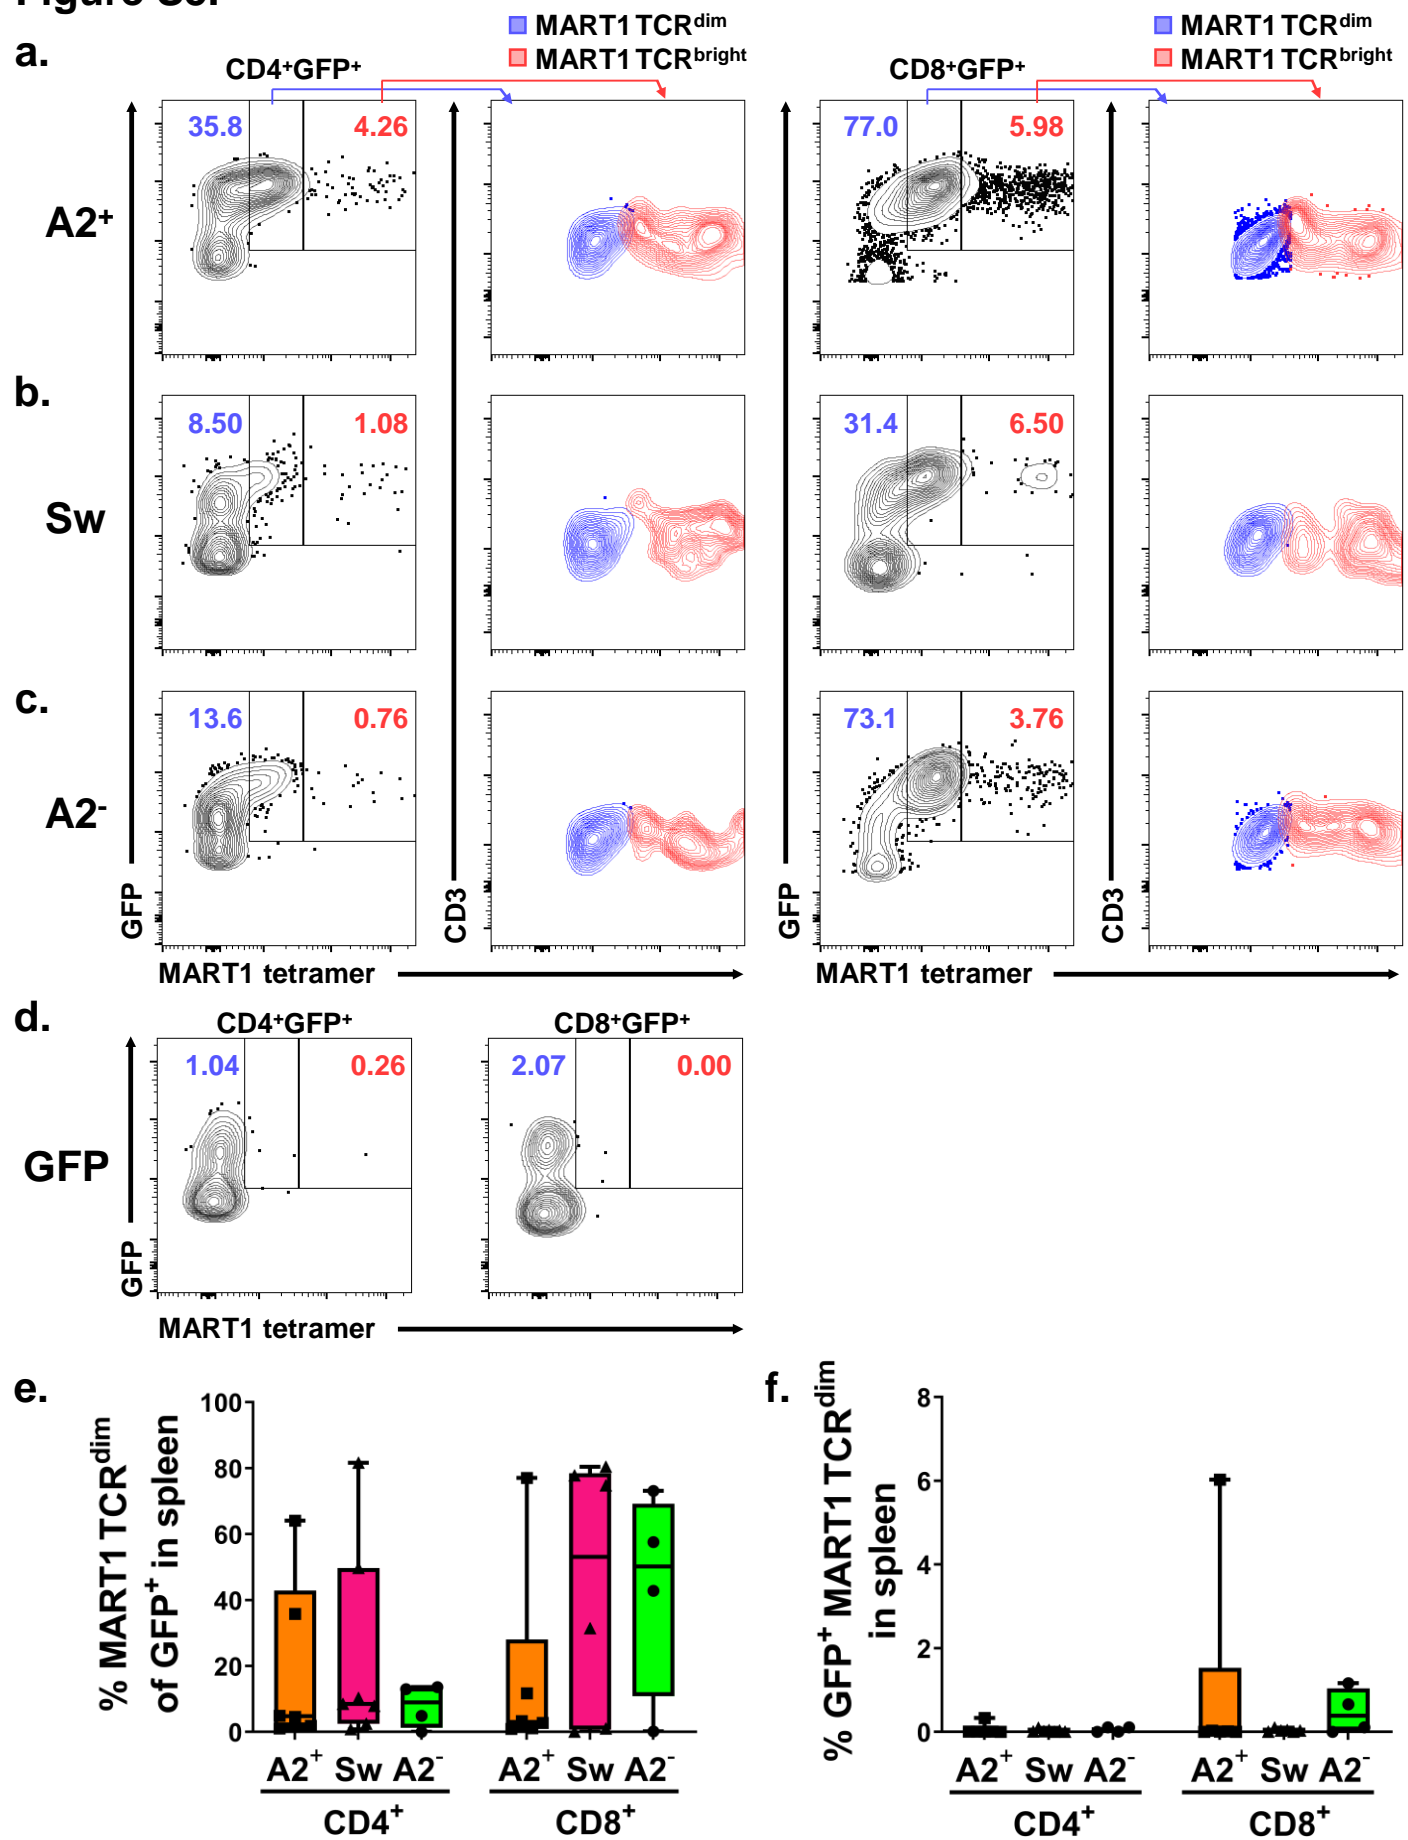

**Figure S5:** A GFP<sup>+</sup> MART1 TCR<sup>dim</sup> population is detected among splenic T cells that may be selected to express multiple, alternate TCR $\alpha$  chains. Tetramer staining of GFP<sup>+</sup>CD4<sup>+</sup> cells and GFP<sup>+</sup>CD8<sup>+</sup> cells in the spleens of mice transplanted with **a.** human HLA-A2<sup>+</sup>, **b.** human HLA-A2<sup>-</sup>, or **c.** swine thymus grafts showing CD3 expression on MART1 TCR<sup>dim</sup> and MART1 TCR<sup>bright</sup> cells. Quantification of MART1 TCR<sup>dim</sup> cells as **e.** a percent of GFP<sup>+</sup> T cells or of **f.** MART1 TCR<sup>dim</sup> CD4<sup>+</sup> and CD8<sup>+</sup> cells among total splenocytes.
